## **Detection of melanin-mediated false-positive for Bax $\Delta$ 2 immunohistochemical staining in human skin tissues**

Sana Basheer, Adriana Mañas, Qi Yao, Katherine Reiner, and Jialing Xiang

Department of Biology, Illinois Institute of Technology, Chicago, IL 60616

\* Corresponding author:

Jialing Xiang

Department of Biology,

Illinois Institute of Technology

3101 South Dearborn Street, Chicago, IL 60616, USA.

Phone: (312)-567-3491

Fax: (312)-567-3494

E-mail: [xiang@iit.edu](mailto:xiang@iit.edu)

## **Abstract**

Bax $\Delta$ 2 is a pro-apoptotic isoform of the Bax family. We have previously shown that Bax $\Delta$ 2 protein expression is low in most healthy human tissues with the protein mainly scattered in the connective tissues. Surprisingly, in skin tissue, the Bax $\Delta$ 2-positive staining was strikingly strong, especially in the basal layer of the epidermis. It has been documented that melanin in the basal cells displays a brown color that could give false-positive staining in the commonly used DAB-based (3,3'-diaminobenzidine) immunostaining. To avoid the false-positive staining from DAB-melanin, we performed immunofluorescent staining on the same set of tissues which were positive for Bax $\Delta$ 2 in the DAB immunostaining. The results from co-immunofluorescent staining of Bax $\Delta$ 2 and a basal cell marker CK-14 showed that the previously detected DAB-stained Bax $\Delta$ 2-positive epidermal cells were CK-14 positive but Bax $\Delta$ 2 negative. Consistent with our previous finding, the Bax $\Delta$ 2-positive cells in the dermis connective tissues are positive in both DAB-based and fluorescence-based immunostainings. These data indicate that the DAB-stained Bax $\Delta$ 2 positive cells in the basal layer of skin tissue are false-positive due to a misinterpretation of the melanin color, but the dermal connective tissue still presents real Bax $\Delta$ 2 positive staining.

## **Introduction**

The skin is the largest organ in the human body, spanning over 22 square feet, and is responsible for about 15-17% of the body mass [1]. It functions in a variety of roles, such as protection from harmful environmental influences and plays an integral part of the immune, endocrine, and nervous systems [2]. Typically, the skin is composed of three distinct layers: the epidermis, the dermis, and the subcutaneous layer. The epidermis consists of 15-20 layers of fully

cornified keratinocytes that are constantly renewed as dead skin cells are sloughed away and replenished [3]. The bottom layer of the epidermis, known as the basal layer, consists of epidermal stem cells and melanocytes [4]. The melanocytes are derived from neural crest cells and produce melanin, which can disperse throughout the cells, including the cells of the basal layer [5].

Bax $\Delta$ 2 is a pro-apoptotic isoform of the Bax family, initially found in patients having colon cancer with high microsatellite instability [6], [7]. Compared to the parental Bax $\alpha$ , Bax $\Delta$ 2 has a stronger pro-death potency [8]. Unlike most members of the pro-apoptotic Bax family which trigger apoptosis through the mitochondrial pathway, Bax $\Delta$ 2 proteins are unable to target mitochondria, instead they accumulate in the cytosol as protein aggregates, activating caspase 8-dependent apoptosis [9]–[11]. Expression of Bax $\Delta$ 2 protein in human tissues has been well characterized by immunohistochemistry with anti-Bax $\Delta$ 2 antibody [12], [13]. Tissue distribution of Bax $\Delta$ 2 is also different from that of Bax $\alpha$ : while Bax $\alpha$  is found abundantly and ubiquitously in almost all tissues including normal and cancerous tissue, Bax $\Delta$ 2 is found in certain types of cells in normal and tumor adjacent normal tissues and rarely detected in malignant tumors [13]. Most Bax $\Delta$ 2-positive cells in healthy tissues were found scattered in the connective tissues, especially in the colon, ovary, stomach, uterus, breast, and prostate [13].

Expression of Bax $\Delta$ 2 in skin tissues appeared unique in comparison with other human tissues [13]. In addition to its typical distribution in the dermal connective tissue layer, most of the Bax $\Delta$ 2-positive cells lined up together at the bottom layer of epidermis [13]. Although the Bax $\Delta$ 2 antibody has been extensively validated and approved to be specific, we still wondered whether such strong positive staining is real Bax $\Delta$ 2 [12], [13]. It has been shown that melanin from basal cells is a brown color comparable to the brown oxidized deposits in DAB staining, resulting in a potential false-positive in DAB-based staining [14]. In this study, we analyzed skin tissues by both

DAB-immunohistochemistry and immunofluorescent staining. We specifically focused on basal cells using co-immunostaining of both Bax $\Delta$ 2 and Cytokeratin-14, a basal cell marker, to avoid DAB-mediated artifact during staining.

## **2. Materials and Methods**

### **2.1 Materials**

Skin FFPE (Formalin-Fixed Paraffin-Embedded) tissue microarray slides were obtained from Biomax (Cat# T211a and SK481) containing both normal and tumor adjacent tissues. The Bax $\Delta$ 2 monoclonal antibody was generated and validated previously [12], [13]. Anti-Cytokeratin 14 (CK-14) antibody was purchased from Abcam. The secondary antibodies Alexa Fluor 488 and Alexa Fluor 594 were purchased from Life Technologies. Common chemicals mentioned below were obtained from Fischer Scientific. The VECTASTAIN Elite ABC HRP Kit (Peroxidase, Standard) was obtained from Vector Laboratories. The ImmPACT DAB Peroxidase (HRP) Substrate Kit was obtained from Fisher Scientific. The VECTOR Hematoxylin stain was obtained from Vector Labs. The Xylene based mounting media was obtained from Polysciences. Phosphate Buffered Saline (PBS) containing 137 mM NaCl, 2.7 mM KCl, 10 mM Na<sub>2</sub>HPO<sub>4</sub>·7H<sub>2</sub>O, pH 7.3. Blocking buffer was prepared with 3% Bovine Serum Albumin diluted in PBS with 0.1% Tween-20. Nuclear staining basic buffer was prepared with 40 mM NaHCO<sub>3</sub> and 80 mM MgSO<sub>4</sub>. Fluoromount was obtained from Southern Biotech.

### **2.2 DAB (3,3'-diaminobenzidine) immunohistochemical staining**

Tissue sections were deparaffinized in xylene and rehydrated in graded ethanol (100%, 95%, 75%). To remove endogenous peroxidase, tissue slides were incubated in a 3% H<sub>2</sub>O<sub>2</sub> dilution in

PBS at room temperature for 10 minutes. Antigen retrieval was performed by immersing slides in 0.01 M sodium citrate buffer (pH 6.0) at 95°C for 10 minutes. To block non-specific binding, tissue slides were incubated in 3% BSA in PBS containing 0.1% Tween-20. Tissue slides were incubated with primary antibodies overnight at 4°C. The anti-Bax $\Delta$ 2 antibody was diluted 1:200 in blocking buffer and the anti-CK-14 antibody was diluted 1:300 in blocking buffer. After washing with PBS, slides were incubated in biotin conjugated secondary antibody dilutions of 1:200 in blocking buffer at room temperature for 2 hours. Vectastain ABC Kit (Vector Laboratories) and ImmPACT DAB Peroxidase Substrate Kit (Vector Laboratories) were used to visualize positive-stained cells, while Hematoxylin QS (Vector Laboratories) was used to visualize the nuclei. The tissue slides were then dehydrated in an increasing gradient of ethanol (95%, 100%, 100%) and re-paraffinized with xylene and mounted in Poly-Mount (Polysciences, Inc.). Finally, for image documentation, the slides were scanned using a CRi Panoramic Scan Whole Slide Scanner with a 40  $\times$  NA 0.95 LWD Zeiss objective on high resolution (0.12  $\mu$ m/pixel) at the Integrated Light Microscopy Core Facility at the University of Chicago and visualized using Panoramic Viewer 1.15.2.

### **2.3 Immunofluorescent staining**

Tissue sections were deparaffinized, rehydrated, antigen retrieved, and blocked in the same way as DAB immunostaining. Tissue slides were incubated with primary antibody dilutions (1:200 for Bax $\Delta$ 2 and 1:300 for CK-14) overnight at 4°C. After washing with PBS, slides were incubated in Alexa Fluor secondary antibody dilutions (1:200) at room temperature for 2 hours. Tissue slides were stained for nuclei with DAPI (4',6-diamidino-2-phenylindole) for 10 minutes at room temperature. Slides were incubated in TrueBlack lipofuscin for 10 seconds to quench any

autofluorescence. Tissue slides were then mounted with Fluoromount (SouthernBiotech). Immunofluorescent staining was imaged using a BZ-X710 digital microscope (Keyence, Itasca, IL, USA) fitted with 10x, 20x, and 40x (PlanFluor, NA 0.45) objectives.

### **3. Results and Discussion**

#### **3.1 Expression of Bax $\Delta$ 2 proteins in normal skin tissues**

We have previously shown that expression of Bax $\Delta$ 2 protein in normal human tissues was very low: the Bax $\Delta$ 2-positive cells were scattered in the connective tissues in a low rate (1-5%) [13]. However, the skin tissue was an exception. In addition to the detection of Bax $\Delta$ 2-positive cells in the dermal connective tissue below the epidermis, striking positive staining could be easily visualized in the epidermis [13] (Fig. 1). These positive cells were often clustered in the bottom layer (Fig. 1a) or spread throughout the epidermis (Fig. 1b). We stained 7 normal and 12 tumor adjacent normal tissue samples, and the positive staining was observed in almost all samples examined with different degrees of positive rate and intensity: some were high and strong (Fig. 1a and b) but others were low and light (Fig. 1c). From the tissue distribution and cell morphology, these Bax $\Delta$ 2-positive stained cells appeared to be basal cells with round nuclei and large cytosol full of positive-stained cytosol granules. These results could imply a unique function of Bax $\Delta$ 2 in the skin tissue that is different from other tissues. However, we would like to confirm this result before further investigation.

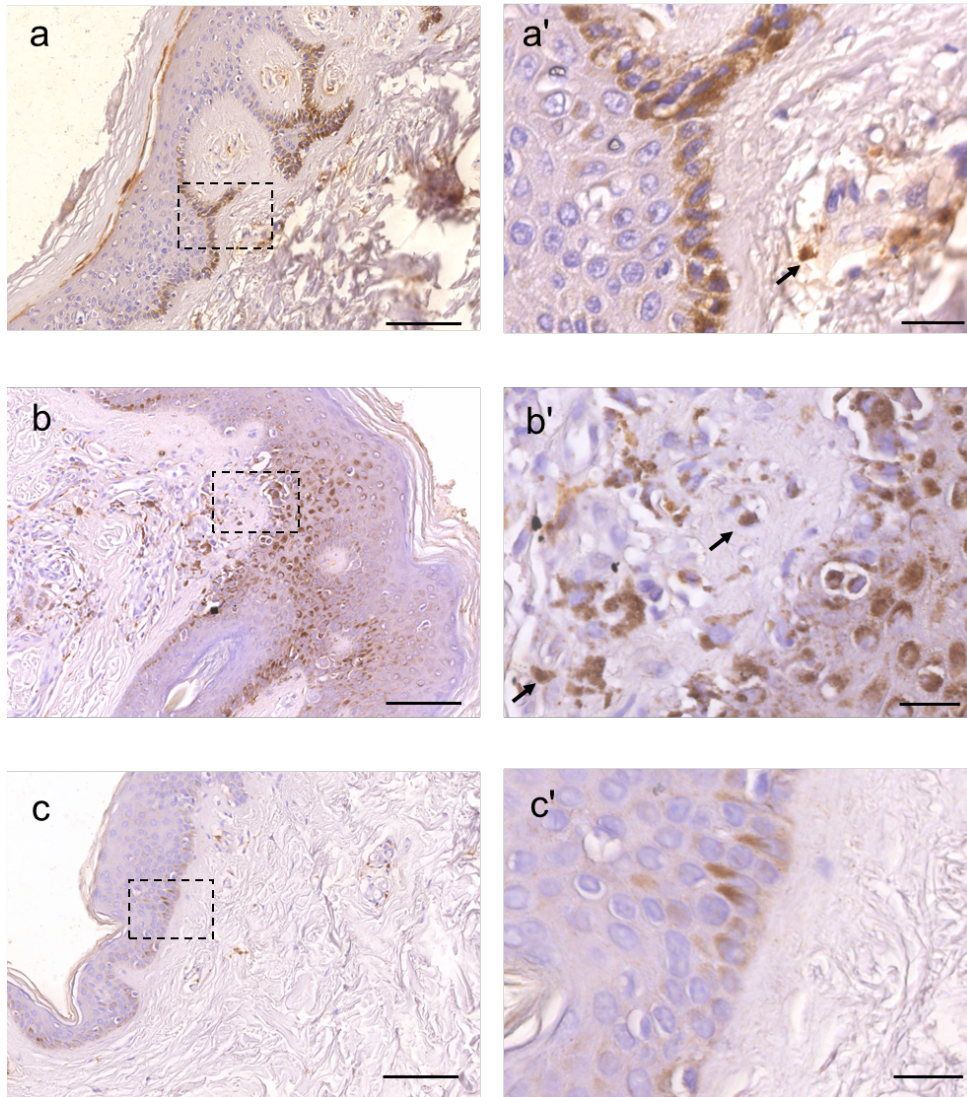

**Fig. 1:** Detection of Bax $\Delta$ 2 positive staining in normal skin tissues using immunohistochemistry. Human skin tissue slides were stained with anti-Bax $\Delta$ 2 antibody using standard DAB. Images from three individuals are shown at the left panel (a, b, c). Scale bar, 100  $\mu$ m. The boxed positive stained areas are enlarged and at the right panel (a', b', c'). Black arrows pointed at Bax $\Delta$ 2 positive cells in dermis connective tissue. Scale bar, 20  $\mu$ m.

### **3.2 DAB-based Bax $\Delta$ 2-positive staining in basal cells is false-positive**

A survey of literature revealed that excessive amounts of melanin pigments could yield false-positive, as melanin is comparable in color to DAB (3,3'-diaminobenzidine) [14]. Since melanin is produced by the melanocytes and dispersed throughout the basal layer, we wondered whether the positive DAB stained cells were due to melanin rather than Bax $\Delta$ 2 proteins [15]. To avoid colorimetric based staining, we used a non-colorimetric based staining method: immunofluorescent staining. We co-immunostained the skin tissues for Bax $\Delta$ 2 and CK-14, which is a hallmark of basal cells in the squamous epithelium [16]. As expected, the CK-14 positive staining showed the typical characteristic pattern in the basal cell layer; the cells were closely stacked and flattened on the bottom layer of the epidermis (Fig. 2a). However, none of the CK-14 positive cells were stained positively for Bax $\Delta$ 2 (Fig. 2a). Bax $\Delta$ 2-positive staining was only observed in the dermal connective tissue underneath the basal cell layer (Fig. 2b indicated by arrow), consistent with our previous finding [13].

These results indicate that the Bax $\Delta$ 2-positive cells detected in the basal layer by DAB-based immunostaining are false-positives most likely due to a misinterpretation of melanin brown color. Melanin pigments contain sulfur, not iron, making them insoluble in water, and they are found in paraffin embedded tissue even after routine fixation [14]. Our results are consistent with previous reports that the excessive amounts of melanin pigments could hamper histopathologic assessments based on DAB staining [13], [14].



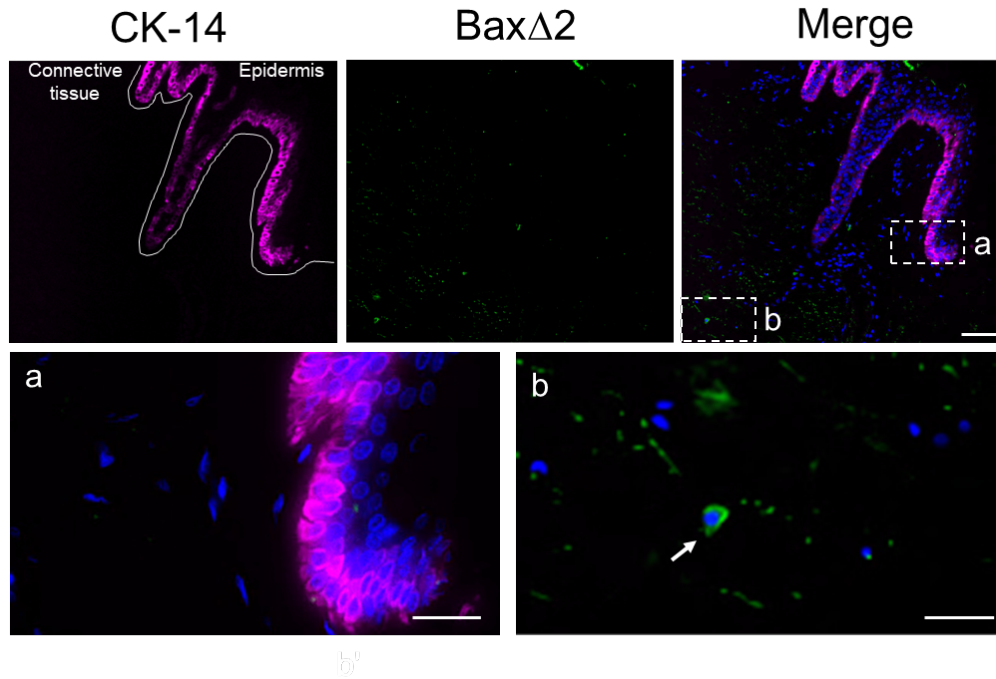

**Fig. 2:** Immunostaining of Bax $\Delta$ 2 in human skin tissue. Co-immunostaining of normal skin tissues with anti-Bax $\Delta$ 2 (green) and CK-14 (purple) antibodies. Nuclei were stained with DAPI. The enlarged regions in the boxed areas (a, b) are shown below. Scale bars, 200  $\mu$ m (top row), 25  $\mu$ m (bottom row).

## References

- [1] Laikova *et al.*, “Advances in the Understanding of Skin Cancer: Ultraviolet Radiation, Mutations, and Antisense Oligonucleotides as Anticancer Drugs,” *Molecules*, vol. 24, no. 8, p. 1516, Apr. 2019, doi: 10.3390/molecules24081516.
- [2] C. M. Chuong *et al.*, “What is the ‘true’ function of skin?,” *Exp. Dermatol.*, vol. 11, no. 2, pp. 159–187, Apr. 2002, doi: 10.1034/j.1600-0625.2002.00112.x.
- [3] M. Boer, E. Duchnik, R. Maleszka, and M. Marchlewicz, “Structural and biophysical characteristics of human skin in maintaining proper epidermal barrier function,” *Adv. Dermatology Allergol.*, vol. 1, pp. 1–5, 2016, doi: 10.5114/pdia.2015.48037.
- [4] M. I. Koster, “Making an Epidermis,” *Ann. N. Y. Acad. Sci.*, vol. 1170, no. 1, pp. 7–10, Jul. 2009, doi: 10.1111/j.1749-6632.2009.04363.x.
- [5] H. Yousef, M. Alhajj, and S. Sharma, *Anatomy, Skin (Integument), Epidermis*. Treasure Island: StatPearls Publishing, 2020.
- [6] B. Haferkamp *et al.*, “Bax $\Delta$ 2 Is a Novel Bax Isoform Unique to Microsatellite Unstable Tumors,” *J. Biol. Chem.*, vol. 287, no. 41, pp. 34722–34729, Oct. 2012, doi: 10.1074/jbc.M112.374785.
- [7] B. Haferkamp *et al.*, “Bax $\Delta$ 2 Family Alternative Splicing Salvages Bax Microsatellite-Frameshift Mutations,” *Genes and Cancer*, vol. 4, no. 11–12, pp. 501–512, 2013, doi: 10.1177/1947601913515906.
- [8] A. Mañas, W. Chen, A. Nelson, Q. Yao, and J. Xiang, “Bax $\Delta$ 2 sensitizes colorectal cancer cells to proteasome inhibitor-induced cell death,” *Biochem. Biophys. Res. Commun.*, vol. 496, no. 1, pp. 18–24, 2018, doi: 10.1016/j.bbrc.2017.12.156.
- [9] H. Zhang *et al.*, “Bax $\delta$ 2 promotes apoptosis through caspase-8 activation in microsatellite-

- unstable colon cancer,” *Mol. Cancer Res.*, vol. 12, no. 9, pp. 1225–1232, 2014, doi: 10.1158/1541-7786.MCR-14-0162.
- [10] A. Mañas *et al.*, “The functional domains for Bax $\Delta$ 2 aggregate-mediated caspase 8-dependent cell death,” *Exp. Cell Res.*, vol. 359, no. 2, pp. 342–355, Oct. 2017, doi: 10.1016/j.yexcr.2017.08.016.
- [11] B. Xie, Q. Yao, J. Xiang, and D. D. L. Minh, “A structural model for bax $\Delta$ 2-mediated activation of caspase 8-dependent apoptosis,” *Int. J. Mol. Sci.*, vol. 21, no. 15, pp. 1–13, 2020, doi: 10.3390/ijms21155476.
- [12] A. Mañas, A. Davis, S. Lamerand, and J. Xiang, “Detection of pro-apoptotic Bax $\Delta$ 2 proteins in the human cerebellum,” *Histochem. Cell Biol.*, vol. 150, no. 1, pp. 77–82, 2018, doi: 10.1007/s00418-018-1669-6.
- [13] A. Mañas *et al.*, “Immunohistochemical detection of the pro-apoptotic Bax $\Delta$ 2 protein in human tissues,” *Histochem. Cell Biol.*, Mar. 2020, doi: 10.1007/s00418-020-01874-w.
- [14] H. Shen and W. Wu, “Study of Melanin Bleaching After Immunohistochemistry of Melanin-containing Tissues,” *Appl. Immunohistochem. Mol. Morphol.*, vol. 23, no. 4, pp. 303–307, Apr. 2015, doi: 10.1097/PAI.0000000000000075.
- [15] J. Sandby-Møller, T. Poulsen, and H. C. Wulf, “Epidermal Thickness at Different Body Sites: Relationship to Age, Gender, Pigmentation, Blood Content, Skin Type and Smoking Habits,” *Acta Derm. Venereol.*, vol. 83, no. 6, pp. 410–413, Nov. 2003, doi: 10.1080/00015550310015419.
- [16] P. Harnden and J. Southgate, “Cytokeratin 14 as a marker of squamous differentiation in transitional cell carcinomas,” *J. Clin. Pathol.*, vol. 50, no. 12, pp. 1032–1033, Dec. 1997, doi: 10.1136/jcp.50.12.1032.
